# Supplementary material for: Transcriptome and Proteome Exploration to Model Translation Efficiency and Protein Stability in Lactococcus lactis
Source: PLoS Comput Biol. 2009 Dec 18;5(12):e1000606. doi: 10.1371/journal.pcbi.1000606 (PMC2787624; doi:10.1371/journal.pcbi.1000606)
Supplement: Table S2 — Regulatory coefficients calculated between the different growth rates (0.16 MB XLS) [file pcbi.1000606.s002.xls]

## Sheet: Table S2
Protein	rt(0.09-0.24)	rt(0.24-0.47)	rt(0.47-0.88)
AMINO-ACID BIOSYNTHESIS
AROH	-0.390652	-1.15105	-0.296919
GLTD	1.12268	-1.45657	0.232609
GLYA	8.14636	-1.44669	-0.11564
ILVD	-0.472946	11.6154	0.344475
THRC	-9.08531	-2.90864	-14.2666
CELLULAR PROCESSES
AHPC	2.29127	0.999773	0.014467
DNAK	-1.59091	-0.970056	-1.46526
FTSA	11.2724	-1.38675	-0.221003
FTSZ	-0.989614	-2.80715	-0.0889492
SECA	1.53216	1.94785	-0.193952
SODA	-2.11624	0.351143	0.546195
TIG	-5.22497	-1.46922	-0.0172195
BIOSYNTHESIS OF COFACTORS, PROSTHETIC GROUPS, AND CARRIERS
MENB	-3.40024	-1.52788	0.102269
NADE	-5.50568	4.22182	-0.000842582
TRXB1	-18.1381	2.58109	0.127969
CELL ENVELOPE
DDL	-7.75791	-2.21787	-0.662406
GLMU	1.76431	0.697935	-0.11673
MURF	-8.13984	-3.18211	-0.0775049
FATTY ACID AND PHOSPHOLIPID METABOLISM
ACCC	-1.61626	-10.5955	-0.73054
FABF	5.22282	-2.3664	-0.293335
HMCM	-2.80972	0.794663	-0.486772
LPLL	-6.03825	-13.0702	-3.3231
THIL	-1.95311	-1.10056	-0.177826
CENTRAL INTERMEDIARY METABOLISM
METK	-3.23673	6.18069	0.450214
ENERGY METABOLISM
ACKA1	14.0671	5.97389	-1.24366
ACKA2	0.933801	-6.81543	-0.495889
ALS	-10.212	-7.64507	-3.03912
ARAT	3.82153	-9.72862	0.761995
BCAT	-34.7823	6.32332	-0.371968
DXSB	12.9382	5.85954	-0.0640468
ENOA	-2.29329	-0.623576	3.25485
FBAA	-7.09491	3.833	-0.508402
GALE	6.87755	-2.38593	0.106529
GAPA	10.3976	1.17911	-0.0401809
GAPB	6.86787	-2.52752	1.58998
GPDA	-2.02488	-50.3078	0.0604768
LDH	53.5852	7.68012	-1.56302
MAE	-1.34866	-6.11291	0.15335
NIFS	1.55651	-0.970106	0.174457
PDHA	4.42919	3.65456	-0.237901
PDHB	2.25124	4.77663	0.522782
PDHD	2.01862	3.16201	0.170528
PFL	1.27071	1.83356	-1.49135
PGK	5.9606	5.59989	0.0668095
PMG	-92.6577	-1.04878	14.538
PYK	-1.62746	5.18997	-6.3572
TKT	49.9891	1.66961	0.997927
TPIA	-1.30311	-42.5616	7.4
YPDB	1.0514	-4.9864	2.9173
YPDD	-16.384	0.838742	45.6839
YPJH	-0.414802	-114.943	0.0248802
YRCA	1.28454	-6.56321	1.12892
ZWF	-10.2094	3.27594	1.1014
OTHER CATEGORIES
CLPB	-2.8846	0.844954	26.9625
CLPE	6.20228	0.566196	0.0823782
DPSA	6.32088	1.8187	0.174564
PURINES, PYRIMIDINES, NUCLEOSIDES AND NUCLEOTIDES
GUAA	-2.12625	-1.10186	-0.00784688
HPT	-2.02029	-6.08339	2.17769
PDP	3.99997	-21.5064	0.130164
PRSB	-4.06827	-1.00005	-0.590617
PYRC	-2.13751	-1.52751	-19.3653
PYRH	-6.55565	-1.25056	0.0164536
RMLA	-0.760552	-0.628121	-1.04025
RMLC	-2.91263	1.37489	0.228023
THYA	-5.04824	806.904	-0.107892
REGULATORY FUNCTIONS
CCPA	4.6695	-2.57203	-6.45356
CODY	52.9946	-2.2487	0.0170956
LLRA	4.39062	3.18646	-0.17748
PURR	-5.48878	-1.45603	0.200901
TYPA	-4.45082	-2.02229	0.300141
REPLICATION
DNAN	-3.03962	4.40212	2.18271
HSLA	1.31389	5.82333	0.387517
RECA	-2.56502	0.939504	1.14252
SSBB	-0.775898	-0.946445	-0.876989
TRANSLATION
ASPS	-3.92827	-58.626	0.382724
DEF	-2.32097	1.22497	0.32414
FMT	-13.6214	-3.14744	0.0681078
GATB	-9.56297	-1.68738	0.351779
PEPC	46.6124	-2.88443	-0.0920847
PEPDB	197.923	-7.8253	-0.0329787
PEPO	2.5723	3.30109	0.554798
PEPP	1.28264	-42.5065	0.0819783
PEPV	20.0922	-29.039	0.398294
PHET	-26.9755	-0.504303	-0.777082
PPIB	-1.15073	1.0905	0.662161
PRFC	3.80665	1.17468	0.446166
PROS	2.43924	4.11994	0.26273
RPLA	1.53845	-0.727496	0.0029722
RPLF	-2.92297	-63.2279	0.686334
RPLI	4.15987	2.63705	-1.17422
RPLK	-18.6381	-0.484849	-0.603714
RPLN	-1.96004	-0.00446254	0.486669
RPLQ	-7.60304	-5.76028	-5.61271
RPSC	10.6402	-0.462009	-0.23218
RPSD	-4.21167	0.296221	-0.315095
RPSF	-1.1628	-0.267894	0.607037
RPSH	-7.12733	1.16368	1.64958
RPSJ	-2.50652	-28.7294	-0.517319
RPST	-2.66978	11.3385	0.554064
TRPS	-1.14316	0.864573	0.0371881
TSF	-1.85892	-1.58254	1.20355
TYRS	-1.05636	5.75205	0.535351
TRANSCRIPTION
GREA	-4.63664	-5.13299	-1.4062
NUSA	18.6756	-4.51283	-1.35448
RPOA	-17.7775	-1.22111	5.90915
TRANSPORT AND BINDING PROTEINS
PTNAB	69.8024	-1.56744	3.57164
PTSI	-1.598	-1.39465	-0.857201
PTSK	-2.70184	1.45878	-0.0373629
YAHG	8.52665	-0.65967	-0.129263
YNGE	7.26991	-2.10205	-2.95527
YSFB	-1.91539	-1.96898	0.311069
UNKNOWN
YAHB	1.72224	0.760241	0.172342
YBJJ	-5.26569	-1.27962	0.00882218
YCGE	-2.27109	1.16423	-0.413099
YCIC	-3.96643	-3.10667	2.14878
YDJD	-4.77813	-4.87075	-0.216095
YEIG	-3.94862	0.899246	-0.076687
YNIH	2.73453	-6.28658	-2.63918
YPDC	1.28698	4.46574	5.75236
YRAB	-1.15275	2.3507	-0.112708
YSEF	-28.7274	1.52948	0.0575684
YTAA	15.8553	0.653845	0.0239083
YTDB	-4.38425	1.30653	0.38485
YTGG	-25.3921	0.506624	0.56699
YTGH	1.37083	1.18044	0.010979
YTHC	-0.418528	2.09941	-0.745776
YTJH	2.20077	-2.163	-2.57863
YUHE	-0.803426	-1.58983	-0.196553
YWCC	0.998748	-1.9647	-3.13451
YWED	-4.74448	1.56382	-0.0756111
